# Supplementary material for: LC-HRMS-Based Non-Targeted Metabolomics for the Assessment of Honey Adulteration with Sugar Syrups: A Preliminary Study
Source: MDPI journal article supplement (doi:10.3390/metabo12100985), 2022-10-18

**Supplementary Figure S4.** Tentative marker identification. MS/MS spectra acquired for marker ion with  $m/z$  515.1444 obtained by analysing a representative extract of a syrup sample in positive ionization mode and applying HCD fragmentation with normalized collision energy of 23%. It was possible to inspect the isotopic distribution of five out of nine product ions, which indicated that four of them were doubly charged product ions (++) and one of them was a singly charged product ion (+), as reported above each inset of the fragmentation spectrum (A).

The lower panel (B) shows the corresponding HCD fragmentation spectrum in which we reported a potential molecular formula together with mass uncertainty with respect to the theoretical value ( $\Delta$  ppm) for the observed product ions. The left part of the spectrum displays three ions (i.e.  $m/z$  127.0390, 145.0494, 163.0600) characterized by a series of water losses (i.e. mass difference of 18.011  $m/z$ ). On the right part of the spectrum, we proposed a potassium adduct for the singly charged ion with  $m/z$  423.0808 given that potassium was present in the precursor ion. In the central part of the spectrum, we observed four doubly charged ions. We proposed a doubly charged adduct for ion with  $m/z$  272.0650 (i.e. adduct  $[M+H+K]^{++}$ ) and its doubly charged water loss (i.e. mass difference of 9.005  $m/z$ ) for ion with  $m/z$  263.0597 (i.e. adduct  $[M-H_2O+H+K]^{++}$ ).

Finally, we tentatively inferred similar adducts for ions with  $m/z$  344.0861 and 353.0913. One of the possible calculated adducts for ion with  $m/z$  344.0861 is  $[C_{31}H_{36}O_{15}+H+K]^{++}$  that could be interpreted as  $[C_{25}H_{28}O_{11}+C_6H_8O_4+H+K]^{++}$ , thus representing a potassium adduct of M associated to another of the observed singly charged product ions (i.e.  $m/z$  145.0494). In a similar way, one of the possible calculated adducts for ion with  $m/z$  353.0861 is  $[C_{31}H_{38}O_{16}+H+K]^{++}$  that could be interpreted as  $[C_{25}H_{28}O_{11}+C_6H_{10}O_5+H+K]^{++}$ , thus representing a potassium adduct of M associated to another of the observed singly charged product ions (i.e.  $m/z$  163.0600).

A.

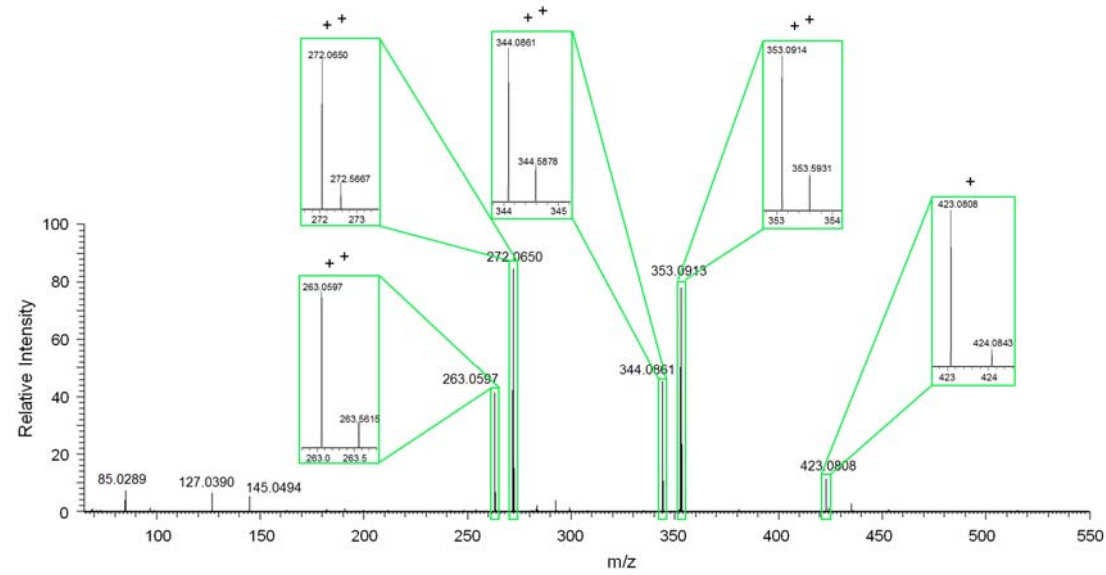

B.

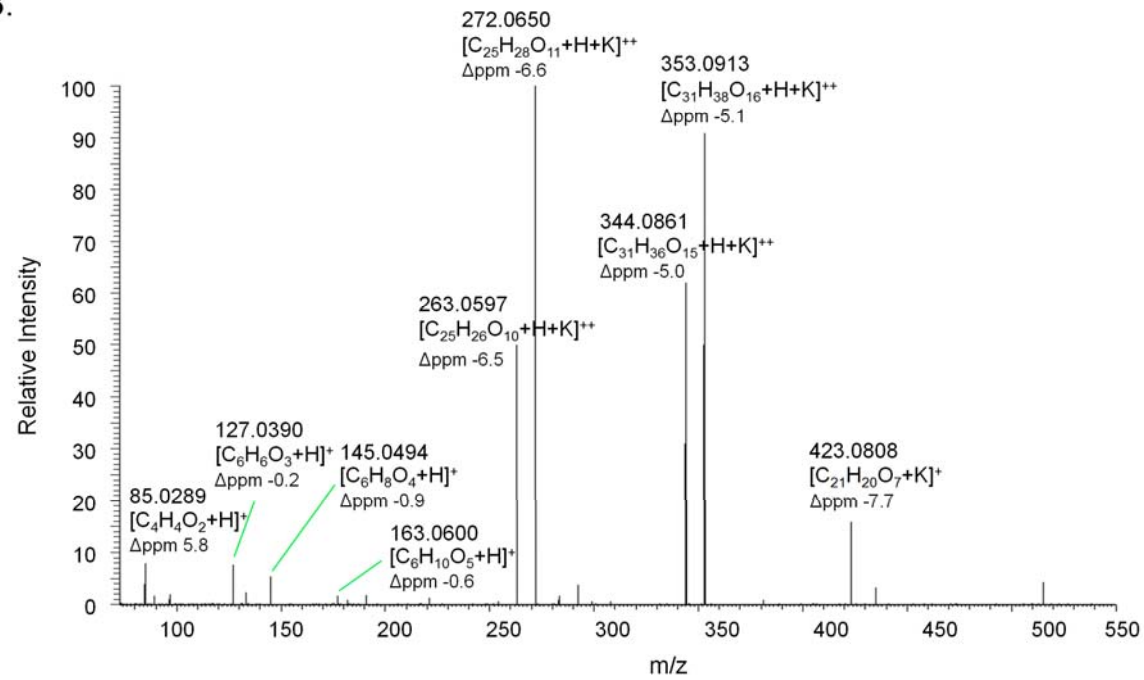

Supplement: s1 [file s1]
